# Supplementary material for: Endothelial PRMT5 plays a crucial role in angiogenesis after acute ischemic injury
Source: JCI journal article supplement (doi:10.1172/jci.insight.152481), 2022-05-08
Supplement: sd1 [file 1]

Supplemental Table 1. Tarlov functional score of ischemic and non-ischemic hindlimb

| Score | Function                                          |
|-------|---------------------------------------------------|
| 0     | No movement                                       |
| 1     | Barely perceptible movement, no weight bearing    |
| 2     | Frequent and vigorous movement, no weight bearing |
| 3     | Supports weight, may take 1 or 2 steps            |
| 4     | Walks with only mild deficit                      |
| 5     | Normal but slow walking                           |
| 6     | Full and fast walking                             |

Supplemental Figure 1

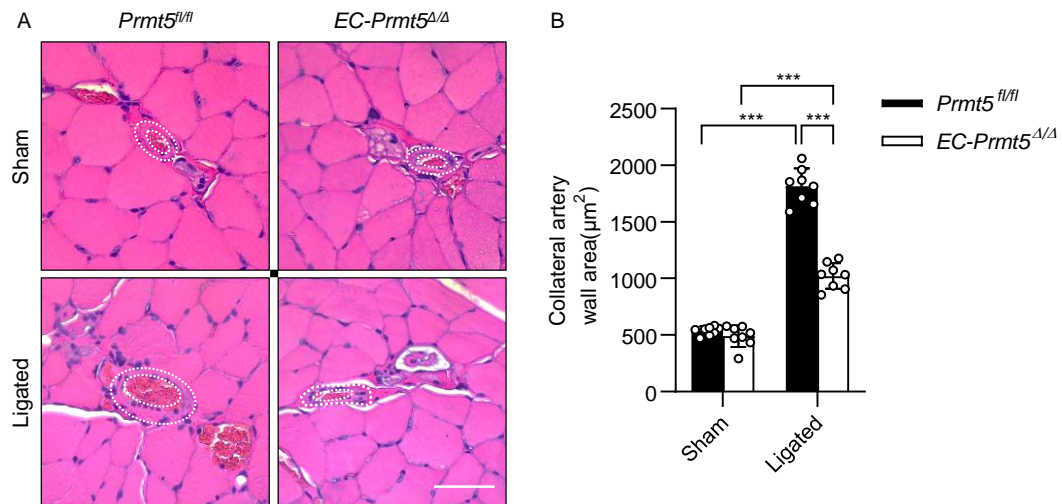

**Supplemental Figure 1. Impairment of the femoral collateral arteries dilation in semimembranosus muscles after hindlimb ischemia in EC-specific *Prmt5*-KO mice.** **A.** H&E staining of semimembranosus muscles in the ischemic and non-ischemic hindlimbs. The femoral collateral arteries were circumscribed by a dashed white line, and the figures were representative of eight individual mice. Scale bar, 50  $\mu\text{m}$ ,  $n=8$ . **B.** Quantification of femoral collateral artery wall areas.  $***P<0.001$ , two-way ANOVA coupled with Tukey's multiple-comparison post hoc test was used. Data were representative of mean  $\pm$  SD,  $n=8$ .

Supplemental Figure 2

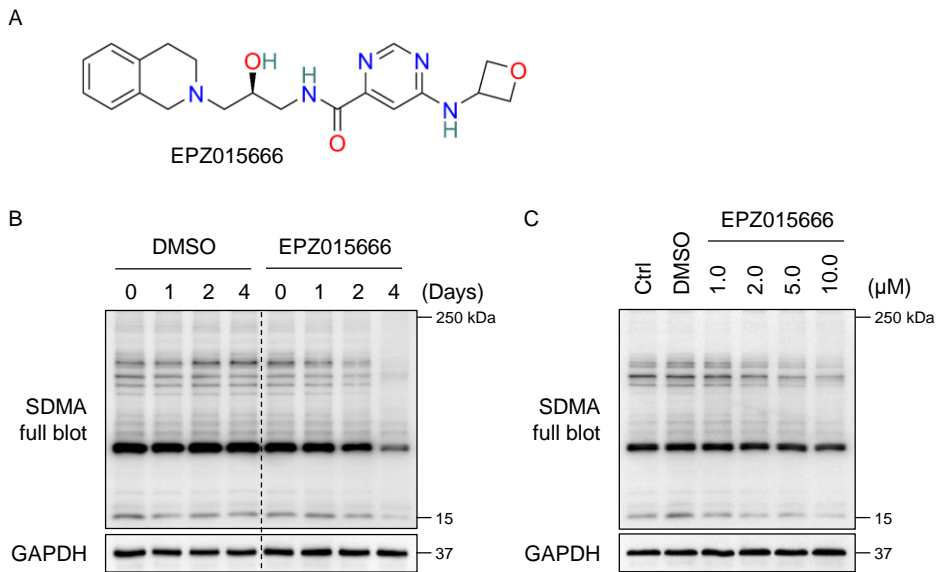

**Supplemental Figure 2. Inhibition of PRMT5 enzymatic activity by EPZ015666 in endothelial cells.** **A**, The 2D chemical formula of PRMT5 inhibitor EPZ015666, containing an epoxy quaternion ring. **B**, HUVECs were treated with 10.0  $\mu$ M EPZ015666 or equal volume of 0.1% DMSO in complete ECM for 0, 2, and 4 days. The expression of SDMA levels was determined by western blot. **C**, HUVECs at 70%-80% confluence were treated with 0.1% DMSO or indicated concentrations of EPZ015666 for 4 days. The levels of SDMA were determined by western blot.
